# Supplementary material for: Hypoglycemic Activity of Rice Resistant-Starch Metabolites: A Mechanistic Network Pharmacology and In Vitro Approach
Source: MDPI journal article supplement (doi:10.3390/metabo14040224), 2024-04-15
Supplement: s1 [file s1]

## Supplementary materials

**Table S1.** 93 differential metabolites of RRS.

| Class        | Number | Differential metabolites  | References |
|--------------|--------|---------------------------|------------|
| saccharide   | 1      | Galactose                 | 15         |
|              | 2      | Fructose                  | 15         |
|              | 3      | Galactose-6-phosphate     | 16         |
| alcohol      | 4      | Glycerol                  | 15         |
|              | 5      | Ethanolamine              | 15         |
|              | 6      | Inositol                  | 15         |
| Organic acid | 7      | 3-Hydroxybutyric acid     | 15         |
|              | 8      | Malic acid                | 16         |
|              | 9      | Pyruvic acid              | 15         |
|              | 10     | Shikimic acid             | 15         |
|              | 11     | Lactic acid               | 15         |
|              | 12     | Oxalic acid               | 15         |
|              | 13     | Succinic acid             | 15         |
|              | 14     | Fumaric acid              | 15         |
|              | 15     | Glyceric acid             | 15         |
|              | 16     | Glycolic acid             | 15         |
|              | 17     | Citric acid               | 16         |
|              | 18     | Isovaleric acid           | 23         |
|              | 19     | Phosphoric acid           | 15         |
|              | 20     | Propionic acid            | 23         |
|              | 21     | Valeric acid              | 23         |
|              | 22     | Isobutyric acid           | 23         |
|              | 23     | Butyric acid              | 23         |
|              | 24     | Deoxycholic acid          | 23         |
|              | 25     | Lithocholylglycine        | 23         |
|              | 26     | Glycoursodeoxycholic acid | 23         |
|              | 27     | Cholic acid               | 23         |
|              | 28     | Chenodeoxycholic acid     | 23         |
|              | 29     | Lithocholic acid          | 23         |
|              | 30     | Ursodeoxycholic acid      | 23         |
| Amino acid   | 31     | Serine                    | 15         |
|              | 32     | Pyroglutamic acid         | 15         |
|              | 33     | Glutamine                 | 15         |
|              | 34     | Alanine                   | 15,23      |
|              | 35     | Asparagine                | 15         |
|              | 36     | L-asparagine              | 17         |
|              | 37     | Aspartic acid             | 15,23      |
|              | 38     | Proline                   | 15         |

|            |    |                                       |          |
|------------|----|---------------------------------------|----------|
|            | 39 | L-proline                             | 17       |
|            | 40 | Tryptophan                            | 15       |
|            | 41 | Threonine                             | 15       |
|            | 42 | Methionine                            | 15       |
|            | 43 | L-methionine                          | 17       |
|            | 44 | Leucine                               | 15,23    |
|            | 45 | Isoleucine                            | 15       |
|            | 46 | Valine                                | 15,23    |
|            | 47 | Glycine                               | 15,17    |
|            | 48 | Phenylalanine                         | 15,23    |
|            | 49 | Taurine                               | 16       |
|            | 50 | 4-Aminobutyric acid                   | 15       |
|            | 51 | Glutamic acid                         | 15,23    |
|            | 52 | L-glutamic acid                       | 17       |
|            | 53 | $\beta$ -Alanine                      | 15       |
|            | 54 | N-acetyl glutamic acid                | 17       |
| Fatty acid | 55 | Linolenic acid                        | 15       |
|            | 56 | Eicosapentaenoic acid                 | 15       |
|            | 57 | Arachidonic acid                      | 15       |
|            | 58 | Eicosatrienoic acid                   | 15       |
|            | 59 | Palmitoleic acid                      | 15,16,17 |
|            | 60 | Lauric acid                           | 15       |
|            | 61 | Myristic acid                         | 15       |
|            | 62 | Palmitic acid                         | 15       |
|            | 63 | Clupanodonic acid                     | 15       |
|            | 64 | Docosatrienoic acid                   | 17       |
|            | 65 | Linoleic acid                         | 15       |
|            | 66 | Oleic acid                            | 15,16    |
|            | 67 | Stearic acid                          | 15       |
|            | 68 | Arachidic acid                        | 15       |
|            | 69 | Behenic acid                          | 15       |
|            | 70 | Lignoceric acid                       | 15       |
|            | 71 | Docosaehaenoic acid                   | 15       |
| alkaloid   | 72 | Butyrylcarnitine                      | 17       |
|            | 73 | LysoPC [16:1 (9Z)]                    | 17       |
|            | 74 | LysoPC (17: 0)                        | 17       |
|            | 75 | LysoPC (20:0)                         | 17       |
|            | 76 | LysoPC [20:1 (11Z)]                   | 17       |
|            | 77 | LysoPC [20:3 (5Z,8Z,11Z)]             | 17       |
|            | 78 | LysoPC (24:0)                         | 17       |
|            | 79 | LysoPC (O-18:0)                       | 17       |
|            | 80 | LysoPC (P-16:0)                       | 17       |
|            | 81 | LysoPC (P-18:0)                       | 17       |
|            | 82 | Phosphatidylcholine [16:1 (9Z) /16:0] | 17       |

|       |    |                                             |    |
|-------|----|---------------------------------------------|----|
|       | 83 | Phosphatidylcholine [18:0/20:3 (5Z,8Z,11Z)] | 17 |
|       | 84 | Phosphatidylcholine [18:2 (9Z,12Z) / 15:0]  | 17 |
|       | 85 | Phosphatidylcholine [O-16:0/18:2 (9Z,12Z)]  | 17 |
| other | 86 | Urea                                        | 15 |
|       | 87 | Uracil                                      | 16 |
|       | 88 | 2 - acetyl pyrazine                         | 17 |
|       | 89 | Norepinephrine                              | 17 |
|       | 90 | 1,5-Anhydroglucitol                         | 16 |
|       | 91 | Glutathione                                 | 17 |
|       | 92 | Ceramide (d18:0/14:0)                       | 17 |
|       | 93 | Sphingomyelin (d18:1/14:0)                  | 17 |

**Table S2.** Molecular docking information of target proteins.

| Target Protein | PDB Entry | Resolution / Å | PDB DOI                                                                               | References |
|----------------|-----------|----------------|---------------------------------------------------------------------------------------|------------|
| DLG4           | 6QJL      | 1.04           | <a href="https://doi.org/10.2210/pdb6QJL/pdb">https://doi.org/10.2210/pdb6QJL/pdb</a> | [36]       |
| EGFR           | 5UG9      | 1.33           | <a href="https://doi.org/10.2210/pdb5UG9/pdb">https://doi.org/10.2210/pdb5UG9/pdb</a> | [37]       |
| ESR1           | 7UJO      | 1.45           | <a href="https://doi.org/10.2210/pdb7UJO/pdb">https://doi.org/10.2210/pdb7UJO/pdb</a> | [38]       |
| FYN            | 6IPY      | 1.34           | <a href="https://doi.org/10.2210/pdb7A2P/pdb">https://doi.org/10.2210/pdb7A2P/pdb</a> | [39]       |
| IL6            | 7NXZ      | 2.00           | <a href="https://doi.org/10.2210/pdb7NXZ/pdb">https://doi.org/10.2210/pdb7NXZ/pdb</a> | [40]       |
| ITGAV          | 5FFG      | 2.25           | <a href="https://doi.org/10.2210/pdb5FFG/pdb">https://doi.org/10.2210/pdb5FFG/pdb</a> | [41]       |
| ITGB1          | 4WK0      | 1.78           | <a href="https://doi.org/10.2210/pdb4WK0/pdb">https://doi.org/10.2210/pdb4WK0/pdb</a> | [42]       |
| LCK            | 1QPC      | 1.60           | <a href="https://doi.org/10.2210/pdb1QPC/pdb">https://doi.org/10.2210/pdb1QPC/pdb</a> | [43]       |
| MAPK1          | 6SLG      | 1.33           | <a href="https://doi.org/10.2210/pdb6SLG/pdb">https://doi.org/10.2210/pdb6SLG/pdb</a> | [44]       |
| MAPK3          | 4QTB      | 1.40           | <a href="https://doi.org/10.2210/pdb4QTB/pdb">https://doi.org/10.2210/pdb4QTB/pdb</a> | [45]       |
| NR3C1          | 4P6X      | 1.95           | <a href="https://doi.org/10.2210/pdb4P6W/pdb">https://doi.org/10.2210/pdb4P6W/pdb</a> | [46]       |
| PPARA          | 6KB1      | 1.25           | <a href="https://doi.org/10.2210/pdb6KB1/pdb">https://doi.org/10.2210/pdb6KB1/pdb</a> | [47]       |
| PRKCA          | 2GZV      | 1.12           | <a href="https://doi.org/10.2210/pdb2GZV/pdb">https://doi.org/10.2210/pdb2GZV/pdb</a> | [48]       |
| PTPN6          | 4GRZ      | 1.37           | <a href="https://doi.org/10.2210/pdb4GRZ/pdb">https://doi.org/10.2210/pdb4GRZ/pdb</a> | [49]       |
| PTPN11         | 3B7O      | 1.60           | <a href="https://doi.org/10.2210/pdb3B7O/pdb">https://doi.org/10.2210/pdb3B7O/pdb</a> | [50]       |
| RARA           | 3KMR      | 1.80           | <a href="https://doi.org/10.2210/pdb3KMR/pdb">https://doi.org/10.2210/pdb3KMR/pdb</a> | [51]       |

**Table S3.** Molecular docking information of target proteins and original ligands.

| Target Protein | PDB Entry | Original ligand | RMSD / Å |
|----------------|-----------|-----------------|----------|
| EGFR           | 5UG9      | 8AM             | 0.528    |
| ITGAV          | 5FFG      | NAG             | 0.751    |
| ITGB1          | 4WK0      | NAG             | 1.168    |
| MAPK3          | 4QTB      | 38Z             | 0.386    |
| NR3C1          | 4P6X      | HCY             | 0.261    |

**Table S4.** Molecular docking results of key RRS metabolites with  $\alpha$ -glucosidase and  $\alpha$ -amylase.

| Number | Ligand                    | Receptor                     | Binding energy |
|--------|---------------------------|------------------------------|----------------|
| 1      | Chenodeoxycholic acid     | $\alpha$ -glucosidase (3W37) | -7.6           |
| 2      | Cholic acid               | $\alpha$ -glucosidase (3W37) | -7.9           |
| 3      | Deoxycholic acid          | $\alpha$ -glucosidase (3W37) | -7.3           |
| 4      | Glycoursodeoxycholic acid | $\alpha$ -glucosidase (3W37) | -8.3           |
| 5      | Lithocholic acid          | $\alpha$ -glucosidase (3W37) | -7.3           |
| 6      | Ursodeoxycholic acid      | $\alpha$ -glucosidase (3W37) | -7.9           |
| 7      | Chenodeoxycholic acid     | $\alpha$ -amylase (1B2Y)     | -8.6           |
| 8      | Cholic acid               | $\alpha$ -amylase (1B2Y)     | -8.6           |
| 9      | Deoxycholic acid          | $\alpha$ -amylase (1B2Y)     | -8.6           |
| 10     | Glycoursodeoxycholic acid | $\alpha$ -amylase (1B2Y)     | -7.7           |
| 11     | Lithocholic acid          | $\alpha$ -amylase (1B2Y)     | -8.4           |
| 12     | Ursodeoxycholic acid      | $\alpha$ -amylase (1B2Y)     | -8.8           |

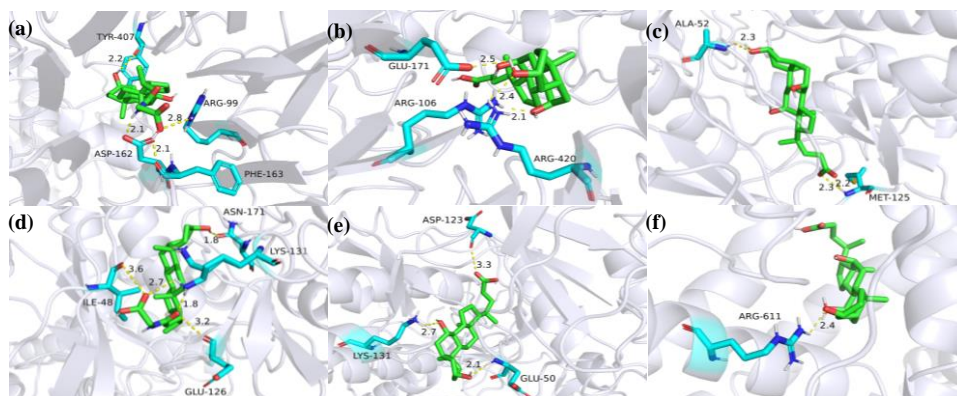

**Figure S1.** Molecular docking of core metabolites of RRS and key targets. (A): Glycoursodeoxycholic acid, ITGAV; (B): Cholic acid, ITGB1; (C): Cholic acid, MAPK3; (D): Lithocholylglycine, MAPK3; (E): Ursodeoxycholic acid, MAPK3; (F): Cholic acid, NR3C1.

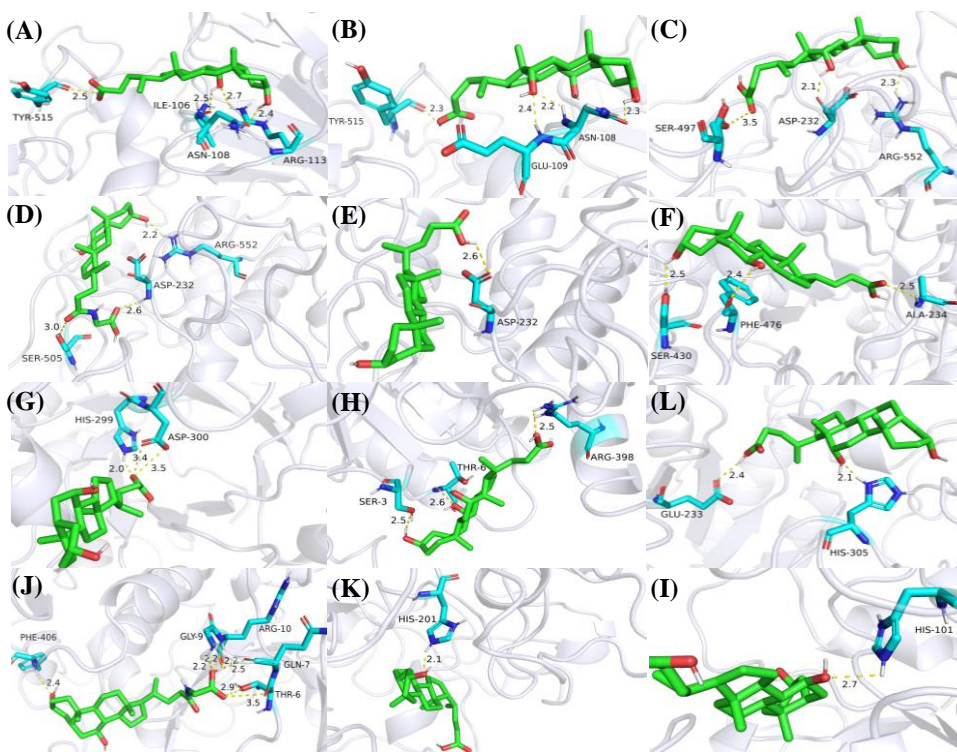

**Figure S2.** Molecular docking validation of key RRS metabolites with  $\alpha$ -glucosidase and  $\alpha$ -amylase. (A): Chenodeoxycholic acid,  $\alpha$ -glucosidase; (B): Cholic acid,  $\alpha$ -glucosidase; (C): Deoxycholic acid,  $\alpha$ -glucosidase; (D): Glycoursodeoxycholic acid,  $\alpha$ -glucosidase; (E): Lithocholic acid,  $\alpha$ -glucosidase; (F): Ursodeoxycholic acid,  $\alpha$ -glucosidase; (G): Chenodeoxycholic acid,  $\alpha$ -amylase; (H): Cholic acid,  $\alpha$ -amylase; (I): Deoxycholic acid,  $\alpha$ -amylase; (J): Glycoursodeoxycholic acid,  $\alpha$ -amylase; (K): Lithocholic acid,  $\alpha$ -amylase; (L): Ursodeoxycholic acid,  $\alpha$ -amylase.

## References

15. Kim, Y.J.; Kim, J.G.; Lee, W.K.; So, K.M.; Kim, J.K. Trial data of the anti-obesity potential of a high resistant starch diet for canines using Dodamssal rice and the identification of discriminating markers in feces for metabolic profiling. *Metabolomics* **2019**, *15*, 21, doi:10.1007/s11306-019-1479-4.
16. Wan, J. Effects of Rice with Different Amounts of Resistant Starch on Mice Fed A High-fat Diet: Regulation of Lipid Metabolism and Gut Microbiota. Ph D thesis, Huazhong Agricultural University, Wuhan, 2021, doi:10.27158/d.cnki.ghznu.2020.000129.
17. Gao, P.; Zhang, Y.; Gao, C.; Xiang, X.; Zhang, X.; Wang, Z. Effects of brown rice on metabolomics related to glucose and lipid in normal rats. *Wei Sheng Yan Jiu* **2021**, *50*, 600-608, doi:10.19813/j.cnki.weishengyanjiu.2021.04.011.
23. Qian, L. Diagnosis of Non-alcoholic Fatty Liver Disease and Clinical Studies of Resistant Starch Intervention. Ph D thesis, Shanghai Jiaotong University, Shanghai, 2022, doi:10.27307/d.cnki.gsytu.2020.000327.
36. Camara-Artigas, A.; Murciano-Calles, J.; Martínez, J.C. Conformational changes in the third PDZ domain of the neuronal postsynaptic density protein 95. *Acta Crystallogr D Struct Biol* **2019**, *75*, 381-391, doi:10.1107/s2059798319001980.
37. Planken, S.; Behenna, D.C.; Nair, S.K.; Johnson, T.O.; Nagata, A.; Almaden, C.; Bailey, S.; Ballard, T.E.; Bernier, L.; Cheng, H.; et al. Discovery of N-((3R,4R)-4-Fluoro-1-(6-((3-methoxy-1-methyl-1H-pyrazol-4-yl)amino)-9-methyl-9H-purin-2-yl)pyrrolidine-3-yl)acrylamide (PF-06747775) through Structure-Based Drug Design: A High Affinity Irreversible Inhibitor Targeting Oncogenic EGFR Mutants with Selectivity over Wild-Type EGFR. *J. Med. Chem.* **2017**, *60*, 3002-3019, doi:10.1021/acs.jmedchem.6b01894.
38. Hosfield, D.J.; Weber, S.; Li, N.S.; Sauvage, M.; Joiner, C.F.; Hancock, G.R.; Sullivan, E.A.; Ndukwe, E.; Han, R.; Cush, S.; et al. Stereospecific lasofoxifene derivatives reveal the interplay between estrogen receptor alpha stability and antagonistic activity in ESR1 mutant breast cancer cells. *Elife* **2022**, *11*, doi:10.7554/eLife.72512.
39. Aldehaiman, A.; Momin, A.A.; Restouin, A.; Wang, L.; Shi, X.; Aljedani, S.; Opi, S.; Lugari, A.; Shahul Hameed, U.F.; Ponchon, L.; et al. Synergy and allostery in ligand binding by HIV-1 Nef. *Biochem J* **2021**, *478*, 1525-1545, doi:10.1042/bcj20201002.
40. Reif, A.; Lam, K.; Weidler, S.; Lott, M.; Boos, I.; Lokau, J.; Bretscher, C.; Mönnich, M.; Perkams, L.; Schmälzlein, M.; et al. Natural Glycoforms of Human Interleukin 6 Show Atypical Plasma Clearance. *Angew. Chem. Int. Ed. Engl.* **2021**, *60*, 13380-13387, doi:10.1002/anie.202101496.
41. Dong, X.; Zhao, B.; Jacob, R.E.; Zhu, J.; Koksai, A.C.; Lu, C.; Engen, J.R.; Springer, T.A. Force interacts with macromolecular structure in activation of TGF- $\beta$ . *Nature* **2017**, *542*, 55-59, doi:10.1038/nature21035.
42. Xia, W.; Springer, T.A. Metal ion and ligand binding of integrin  $\alpha 5\beta 1$ . *Proc Natl Acad Sci U S A* **2014**, *111*, 17863-17868, doi:10.1073/pnas.1420645111.
43. Zhu, X.; Kim, J.L.; Newcomb, J.R.; Rose, P.E.; Stover, D.R.; Toledo, L.M.; Zhao, H.; Morgenstern, K.A. Structural analysis of the lymphocyte-specific kinase Lck in complex with non-selective and Src family selective kinase inhibitors. *Structure* **1999**, *7*, 651-661, doi:10.1016/s0969-2126(99)80086-0.
44. Ward, R.A.; Anderton, M.J.; Bethel, P.; Breed, J.; Cook, C.; Davies, E.J.; Dobson, A.; Dong, Z.;

- Fairley, G.; Farrington, P.; et al. Discovery of a Potent and Selective Oral Inhibitor of ERK1/2 (AZD0364) That Is Efficacious in Both Monotherapy and Combination Therapy in Models of Nonsmall Cell Lung Cancer (NSCLC). *J. Med. Chem.* **2019**, *62*, 11004-11018, doi:10.1021/acs.jmedchem.9b01295.
45. Chaikuad, A.; Tacconi, E.M.; Zimmer, J.; Liang, Y.; Gray, N.S.; Tarsounas, M.; Knapp, S. A unique inhibitor binding site in ERK1/2 is associated with slow binding kinetics. *Nat. Chem. Biol.* **2014**, *10*, 853-860, doi:10.1038/nchembio.1629.
  46. He, Y.; Yi, W.; Suino-Powell, K.; Zhou, X.E.; Tolbert, W.D.; Tang, X.; Yang, J.; Yang, H.; Shi, J.; Hou, L.; et al. Structures and mechanism for the design of highly potent glucocorticoids. *Cell Res.* **2014**, *24*, 713-726, doi:10.1038/cr.2014.52.
  47. Kamata, S.; Oyama, T.; Saito, K.; Honda, A.; Yamamoto, Y.; Suda, K.; Ishikawa, R.; Itoh, T.; Watanabe, Y.; Shibata, T.; et al. PPAR $\alpha$  Ligand-Binding Domain Structures with Endogenous Fatty Acids and Fibrates. *iScience* **2020**, *23*, 101727, doi:10.1016/j.isci.2020.101727.
  48. Elkins, J.M.; Papagrigoriou, E.; Berridge, G.; Yang, X.; Phillips, C.; Gileadi, C.; Savitsky, P.; Doyle, D.A. Structure of PICK1 and other PDZ domains obtained with the help of self-binding C-terminal extensions. *Protein Sci.* **2007**, *16*, 683-694, doi:10.1110/ps.062657507.
  49. Alicea-Velázquez, N.L.; Jakoncic, J.; Boggon, T.J. Structure-guided studies of the SHP-1/JAK1 interaction provide new insights into phosphatase catalytic domain substrate recognition. *J Struct Biol* **2013**, *181*, 243-251, doi:10.1016/j.jsb.2012.12.009.
  50. Barr, A.J.; Ugochukwu, E.; Lee, W.H.; King, O.N.; Filippakopoulos, P.; Alfano, I.; Savitsky, P.; Burgess-Brown, N.A.; Müller, S.; Knapp, S. Large-scale structural analysis of the classical human protein tyrosine phosphatome. *Cell* **2009**, *136*, 352-363, doi:10.1016/j.cell.2008.11.038.
  51. le Maire, A.; Teyssier, C.; Erb, C.; Grimaldi, M.; Alvarez, S.; de Lera, A.R.; Balaguer, P.; Gronemeyer, H.; Royer, C.A.; Germain, P.; et al. A unique secondary-structure switch controls constitutive gene repression by retinoic acid receptor. *Nat. Struct. Mol. Biol.* **2010**, *17*, 801-807, doi:10.1038/nsmb.1855.
